# Supplementary material for: Circulating KRAS G12D but not G12V is associated with survival in metastatic pancreatic ductal adenocarcinoma
Source: PubMed Central journal article supplement (PMC11233636; doi:10.1038/s41467-024-49915-5), 2024-07-09
Supplement: 41467_2024_49915_MOESM1_ESM.pdf [file 41467_2024_49915_MOESM1_ESM.pdf]

Circulating KRAS G12D but not G12V is associated with survival in  
metastatic pancreatic ductal adenocarcinoma  
Supplementary Information

**Table of Contents**

|                         |    |
|-------------------------|----|
| Supplementary Methods   | 2  |
| Supplementary Table 1   | 4  |
| Supplementary Figure 1  | 5  |
| Supplementary Table 2   | 6  |
| Supplementary Table 3   | 7  |
| Supplementary Figure 2  | 8  |
| Supplementary Figure 4  | 10 |
| Supplementary Figure 5  | 11 |
| Supplementary Figure 6  | 12 |
| Supplementary Table 4   | 13 |
| Supplementary Figure 7  | 14 |
| Supplementary Figure 8  | 15 |
| Supplementary Table 5   | 16 |
| Supplementary Figure 9  | 17 |
| Supplementary Figure 10 | 18 |
| Supplementary Figure 11 | 19 |
| Supplementary Table 6   | 20 |
| Supplementary Figure 12 | 21 |

## Supplementary Methods

For the PRINCE trial, peripheral blood was collected into Streck Cell-Free DNA Blood Collection Tubes tubes (Streck #0230470). For the SOC cohort, specimens were collected in K2EDTA Blood Collection Tubes (EMSCO Fisher #0265732) or Streck Cell-Free DNA Blood Collection tubes. K2EDTA collected specimens were processed to plasma within 3 hours of collection while Streck collected specimens were processed within 7 days. Blood processing occurred at room temperature with an initial centrifugation at 1600 g for 10 minutes (centrifuge brake-off). The upper, plasma, layer was transferred to a new tube and centrifuged again (one or two more times) at 3000 g for 10 minutes (EDTA) or 4122 g for 15 minutes (Streck), again with centrifuge brake-off. The final plasma layer was isolated and banked in 1 mL aliquots in 2mL Sarstedt tubes (Sarstedt #72.694.416) at -80 C.

Circulating cell-free DNA (ccfDNA) extraction using the QIAmp Circulating Nucleic Acid Kit (Qiagen #55114) was performed according to the manufacturer's protocol with two modifications: the proteinase K digestion was extended to 1 hour and final elution was performed twice with 30  $\mu$ L of Buffer AVE (total 60  $\mu$ L). Extraction with the QIAmp MinElute ccfDNA Mini Kit (Qiagen #55204) was also performed according to the manufacturer's instructions with a single modification: final elution in 30  $\mu$ L of ultra-clean water run through the column twice. Samples were stored at 4 C prior to quantification.

Quantitative PCR for a 115 bp amplicon of human ALU repeat element was used to determine ccfDNA concentration (primers: forward 5'-CCTGAGGTCAGGAGTTCGAG-3' and reverse 5'-CCCGAGTAGCTGGGATTACA-3')<sup>1</sup>. Samples were diluted 1:10 with nuclease free water and a standard curve was generated by serial dilution of a commercial DNA standard (Promega G3041). Power SYBR Green PCR Master Mix (Applied Biosystems #4367659) was used according to the manufacturer's instructions on a ViiA 7 Real-Time PCR System (Applied Biosystems). Results were analyzed using QuantStudio Real-Time PCR Software (Applied Biosystems).

Prior to droplet digital PCR (ddPCR), ccfDNA was pre-amplified for the *KRAS* G12 locus (primers: forward 5'-AGGCCTGCTGAAAATGACTGAATAT-3' and reverse 5'-GCTGTATCGTCAAGGCACTCT-3'). This PCR was performed using the Q5 Hot Start Hi-Fidelity Master Mix (NEB #M0494), and 0.05  $\mu$ M primers with either 15  $\mu$ L of QIAmp Circulating Nucleic Acid Kit ccfDNA or up to 24  $\mu$ L of QIAmp MinElute ccfDNA Mini Kit ccfDNA (with a maximum of 30 ng). PCR was performed in the Veriti 96 Well Thermal Cycler (Applied Biosystems) with the following program: 98 C for 3 minutes, 9 cycles of 98 C for 10 seconds, 63 C 3 minutes, and 72 C 30 seconds, followed by 72 C for 2 minutes<sup>2</sup>. Pre-amplified material was diluted 1:4 with TE buffer and stored at 4 C in the short-term and -20 C in the long-term storage.

For RainDrop ddPCR, initial characterization was carried out with a multiplex reaction (using the same primers as pre-amplification above) and probes for *KRAS* G12WT (VIC-TTGGAGCTGGTGGCGT-MGBNFQ), G12D (FAM-TGGAGCTGATGGCGT-MGBNFQ), G12V (FAM-GAGCTGTTGGCGT-MGBNFQ), and G12R (FAM-TTGGAGCTCGTGGCGT-MGBNFQ). Reactions contained 2x TaqMan Genotyping Master Mix (Applied Biosystems #4371355), 25x Droplet Stabilizer (RainDance #30-07026), 200nM primers, G12WT, G12D, and G12V probes at 100 nM, G12R probe at 50 nM and 10  $\mu$ L of pre-amplified ccfDNA in a total of 30  $\mu$ L. Final quantification of variant allele fraction (VAF) was carried out in a duplex reaction with the above conditions but only two probes (G12WT and G12Mutant of interest) at 100 nM each. Droplets were generated from 25  $\mu$ L of reaction mix on the RainDrop Source instrument (RainDance Technologies, Inc.). Next, PCR was performed in a GeneTouch PCR Thermal Cycler (Bioer Technology Co., Ltd.); 0.6 C per second ramp rate with the following cycling conditions, 95 C for 10 minutes, 45 cycles of 95 C for 15

seconds and 60 C for 1 minute, 10 minutes at 5 C, and held at 4 C. Droplets were read on the RainDrop Sense instrument (RainDance Technologies, Inc.) and data analyzed in RainDrop Analyst software (RainDance Technologies, Inc.). Droplet counts were adjusted to copy counts using the Poisson correction and background adjusted based on 20 healthy control samples<sup>3</sup>.

For QX200 platform (Bio-Rad Laboratories, Inc) ddPCR, initial characterization with *KRAS G12/G13* Screening Kit (Bio-Rad, #1863506) was carried out according to manufacturer's instruction utilizing the maximum amount of pre-amplified material that resulted in less than 100,000 copies measured (to not overload the assay). Subsequent analysis with individual variant assays were carried out similarly (G12A, dHsaMDV2510586; G12C, dHsaMDV2510584; G12D, dHsaMDV2510596; G12R, dHsaMDV2510590; G12S, dHsaMDV2510588; G12V, dHsaMDV2510592; G13D, dHsaMDV2510598).

### **Supplementary Methods References**

1. Fawzy, A., Sweify, K.M., El-Fayoumy, H.M. & Nofal, N. Quantitative analysis of plasma cell-free DNA and its DNA integrity in patients with metastatic prostate cancer using ALU sequence. *J Egypt Natl Canc Inst* **28**, 235-242 (2016).
2. Jackson, J.B., *et al.* Multiplex Preamplification of Serum DNA to Facilitate Reliable Detection of Extremely Rare Cancer Mutations in Circulating DNA by Digital PCR. *J Mol Diagn* **18**, 235-243 (2016).
3. Milbury, C.A., *et al.* Determining lower limits of detection of digital PCR assays for cancer-related gene mutations. *Biomol Detect Quantif* **1**, 8-22 (2014).

| Patient#  | Prior Treatment | Tissue KRAS Variant | Baseline Plasma ctKRAS Variant |
|-----------|-----------------|---------------------|--------------------------------|
| PRINCE001 | Yes             | No Sample           | No Sample                      |
| PRINCE002 | Yes             | Q61H                | No Sample                      |
| PRINCE003 | Yes             | G12D                | G12D                           |
| PRINCE004 | No              | G12R                | No Sample                      |
| PRINCE005 | No              | G12V                | Inconclusive                   |
| PRINCE006 | Yes             | G12D                | G12D                           |
| PRINCE007 | No              | No Sample           | Inconclusive                   |
| PRINCE008 | Yes             | G12V                | G12V                           |
| PRINCE009 | Yes             | G12V                | G12V                           |
| PRINCE010 | No              | G12V                | G12V                           |
| PRINCE011 | Yes             | Not Detected        | Inconclusive                   |
| PRINCE012 | Yes             | G12V                | G12V                           |
| PRINCE013 | No              | No Sample           | G12D                           |
| PRINCE014 | Yes             | G12V                | G12V                           |
| PRINCE015 | No              | G12D                | G12D                           |
| PRINCE016 | No              | G12D                | G12D                           |
| PRINCE017 | No              | No Sample           | G12D                           |
| PRINCE018 | No              | G12D                | G12D                           |
| PRINCE019 | Yes             | No Sample           | G12D                           |
| PRINCE020 | No              | G12D                | G12D                           |
| PRINCE021 | Yes             | G12D                | Inconclusive                   |
| PRINCE022 | No              | G12V                | G12V                           |
| PRINCE023 | No              | Not Detected        | No Sample                      |
| PRINCE024 | Yes             | No Sample           | Inconclusive                   |
| PRINCE025 | No              | G12V                | G12V                           |
| PRINCE026 | No              | G12D                | Inconclusive                   |
| PRINCE027 | No              | G12V                | G12V                           |
| PRINCE028 | Yes             | Not Detected        | Conclusive Negative            |
| PRINCE029 | Yes             | G12D                | Inconclusive                   |
| PRINCE030 | No              | Not Detected        | Inconclusive                   |
| PRINCE031 | No              | No Sample           | G12V                           |
| PRINCE032 | No              | G12D                | G12D                           |
| PRINCE033 | Yes             | G12R                | Inconclusive                   |
| PRINCE034 | No              | Not Detected        | Inconclusive                   |
| PRINCE035 | No              | G12R                | G12R                           |
| PRINCE036 | No              | G12V                | G12V                           |
| PRINCE037 | No              | No Sample           | G12D                           |
| PRINCE038 | No              | G12V                | G12V                           |
| PRINCE039 | No              | G12D                | G12D                           |
| PRINCE040 | No              | G12R                | G12R                           |
| PRINCE041 | Yes             | G12D                | G12D                           |
| PRINCE042 | No              | G12D                | G12D                           |
| PRINCE043 | No              | G12D                | No Sample                      |
| PRINCE044 | No              | G12D                | G12D                           |
| PRINCE045 | No              | Not Detected        | G12V                           |
| PRINCE046 | No              | Not Detected        | No Sample                      |
| PRINCE047 | No              | G12R                | G12R                           |
| PRINCE048 | No              | G12V                | G12V                           |
| PRINCE049 | No              | Not Detected        | Inconclusive                   |
| PRINCE050 | No              | No Sample           | G12D                           |
| PRINCE051 | No              | G12D                | G12D                           |
| PRINCE052 | No              | G12V                | G12V                           |
| PRINCE053 | No              | No Sample           | G12D                           |
| PRINCE054 | No              | G12D                | G12D                           |
| PRINCE055 | No              | G12V                | G12V                           |
| PRINCE056 | No              | G12V                | G12V                           |
| PRINCE057 | No              | No Sample           | G12D                           |
| PRINCE058 | No              | G12V                | G12V                           |
| PRINCE059 | Yes             | No Sample           | G12D                           |
| PRINCE060 | No              | No Sample           | No Sample                      |
| PRINCE061 | No              | G12D                | G12D                           |
| PRINCE062 | No              | No Sample           | G12R                           |
| PRINCE063 | Yes             | Not Detected        | Inconclusive                   |
| PRINCE064 | Yes             | G12D                | G12D                           |
| PRINCE065 | No              | Not Detected        | Inconclusive                   |

| Patient#  | Prior Treatment | Tissue KRAS Variant | Baseline Plasma ctKRAS Variant |
|-----------|-----------------|---------------------|--------------------------------|
| PRINCE066 | No              | G12V                | Inconclusive                   |
| PRINCE067 | Yes             | No Sample           | G12D                           |
| PRINCE068 | No              | G12V                | G12V                           |
| PRINCE069 | Yes             | G12V                | G12V                           |
| PRINCE070 | No              | No Sample           | G12D                           |
| PRINCE071 | Yes             | Not Detected        | No Sample                      |
| PRINCE072 | No              | G12D                | G12D                           |
| PRINCE073 | No              | G12R                | G12R                           |
| PRINCE074 | Yes             | No Sample           | Inconclusive                   |
| PRINCE075 | No              | Q61H                | G12S                           |
| PRINCE076 | Yes             | Not Detected        | Inconclusive                   |
| PRINCE077 | Yes             | No Sample           | G12D                           |
| PRINCE078 | No              | No Sample           | G12D                           |
| PRINCE079 | Yes             | G12D                | G12D                           |
| PRINCE080 | Yes             | G12D                | G12D                           |
| PRINCE081 | No              | Not Detected        | G12D                           |
| PRINCE082 | No              | G12D                | G12D                           |
| PRINCE083 | No              | Not Detected        | Conclusive Negative            |
| PRINCE084 | No              | No Sample           | No Sample                      |
| PRINCE085 | No              | Not Detected        | G12D                           |
| PRINCE086 | No              | No Sample           | Conclusive Negative            |
| PRINCE087 | No              | No Sample           | G12V                           |
| PRINCE088 | No              | G12R                | G12R                           |
| PRINCE089 | No              | Not Detected        | Inconclusive                   |
| PRINCE090 | No              | Q61H                | Inconclusive                   |
| PRINCE091 | No              | G12V                | G12V                           |
| PRINCE092 | No              | G12D                | G12D                           |
| PRINCE093 | No              | No Sample           | No Sample                      |
| PRINCE094 | No              | No Sample           | G12D                           |
| PRINCE095 | No              | Not Detected        | No Sample                      |
| PRINCE096 | No              | No Sample           | Inconclusive                   |
| PRINCE097 | No              | No Sample           | G12D                           |
| PRINCE098 | No              | G12V                | No Sample                      |
| PRINCE099 | No              | G12D                | G12D                           |
| PRINCE100 | No              | No Sample           | G12V                           |
| PRINCE101 | No              | G12V                | Inconclusive                   |
| PRINCE102 | No              | Not Detected        | G12R                           |
| PRINCE103 | No              | No Sample           | No Sample                      |
| PRINCE104 | No              | G12D                | G12D                           |
| PRINCE105 | No              | No Sample           | No Sample                      |
| PRINCE106 | No              | G12D                | G12D+G12V                      |
| PRINCE107 | Yes             | No Sample           | G12D+G12V                      |
| PRINCE108 | No              | No Sample           | G12V                           |
| PRINCE109 | No              | G12V                | G12V                           |
| PRINCE110 | No              | G12D                | G12D                           |
| PRINCE111 | No              | No Sample           | G12D                           |
| PRINCE112 | No              | No Sample           | G12V                           |
| PRINCE113 | No              | No Sample           | G12D+G12V                      |
| PRINCE114 | No              | Not Detected        | G12D                           |
| PRINCE115 | No              | No Sample           | G12V                           |
| PRINCE116 | No              | G12V                | G12V                           |
| PRINCE117 | No              | Not Detected        | G12V                           |
| PRINCE118 | No              | No Sample           | G12D+G12V                      |
| PRINCE119 | No              | No Sample           | G12D                           |
| PRINCE120 | Yes             | G12R                | Inconclusive                   |
| PRINCE121 | Yes             | Not Detected        | G12V                           |
| PRINCE122 | No              | No Sample           | Inconclusive                   |
| PRINCE123 | Yes             | Q61H                | Inconclusive                   |
| PRINCE124 | No              | No Sample           | Inconclusive                   |
| PRINCE125 | Yes             | Q61R                | Inconclusive                   |
| PRINCE126 | No              | G12D                | G12D                           |
| PRINCE127 | Yes             | G12D                | G12D                           |
| PRINCE128 | Yes             | G12V                | G12V                           |
| PRINCE129 | Yes             | Not Detected        | Inconclusive                   |

**Supplementary Table 1. Individual PRINCE trial cohort patient data regarding prior treatment history and KRAS variant detection in tissue and baseline plasma.**

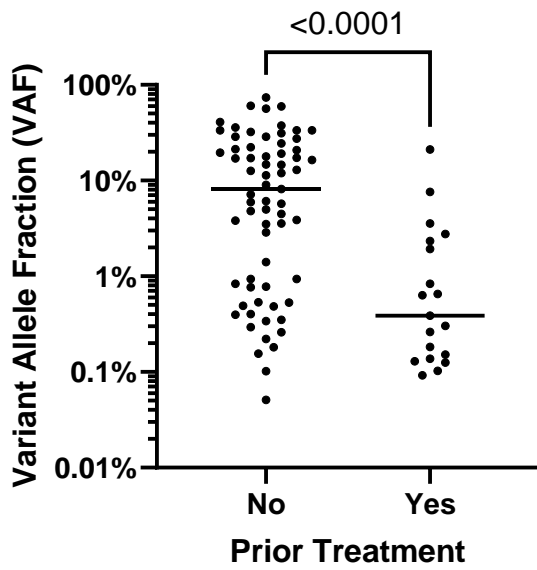

**Supplementary Figure 1. Prior Treatment and ctKRAS VAF Levels for PRINCE patients.** Among 86 PRINCE trial patients with a baseline plasma ctKRAS mutation detected, VAF levels were significantly higher for patients without prior treatment (n=67) than for those with prior treatment (n=19; Mann-Whitney test, (two-sided)). Source data are provided as a Source Data file.

|                           | PRINCE<br>(N=83) | SOC<br>(N=85) | P-value |
|---------------------------|------------------|---------------|---------|
| Age                       |                  |               |         |
| Median (Range)            | 62 (35-79)       | 67 (38-87)    | 0.0318* |
| <65                       | 46 (55%)         | 38 (45%)      | 0.2169† |
| >65                       | 37 (45%)         | 47 (55%)      |         |
| Sex                       |                  |               |         |
| Female                    | 35 (42%)         | 37 (44%)      | 0.8773† |
| Male                      | 48 (58%)         | 48 (56%)      |         |
| Race                      |                  |               |         |
| Asian                     | 6 (7%)           | 1 (1%)        | 0.1089‡ |
| Black or African American | 3 (4%)           | 5 (6%)        |         |
| Caucasian                 | 72 (87%)         | 73 (86%)      |         |
| Other                     | 2 (2%)           | 6 (7%)        |         |
| Ethnicity                 |                  |               |         |
| Hispanic or Latino        | 1 (1%)           | 0 (0%)        | 0.5529† |
| Not Hispanic or Latino    | 82 (99%)         | 85 (100%)     |         |
| ECOG PS                   |                  |               |         |
| 0                         | 36 (43%)         | 29 (34%)      | 0.0011‡ |
| 1                         | 47 (57%)         | 41 (48%)      |         |
| 2                         | 0 (0%)           | 13 (15%)      |         |
| 3                         | 0 (0%)           | 2 (2%)        |         |
| ctKRAS Variant            |                  |               |         |
| G12D                      | 33 (40%)         | 34 (40%)      | 0.6149‡ |
| G12V                      | 23 (28%)         | 20 (24%)      |         |
| G12R                      | 7 (8%)           | 13 (15%)      |         |
| Other                     | 4 (5%)           | 2 (2%)        |         |
| Negative                  | 16 (19%)         | 16 (19%)      |         |

\*Mann-Whitney Test (two-sided), †Fisher's Exact Test (two-sided), ‡Chi-square Test (two-sided)

**Supplementary Table 2.** Characteristics of patients with baseline plasma analyzed in the PRINCE and standard of care (SOC) cohorts. ECOG PS refers to Eastern Cooperative Oncology Group Performance Status scale. All PRINCE patients received chemoimmunotherapy as part of a clinical trial. Among the 85 SOC patients, 36 received gemcitabine-based therapy (including gemcitabine alone, gemcitabine/nab-paclitaxel, and gemcitabine/cisplatin) and 49 patients received folfirinox-based therapy (including folfirinox, FOLFOX, mFolfirinox, mFOLFOX, and mFOLFOX 6). Source data are provided as a Source Data file.

## PRINCE patients

|                           | G12D<br>Bearing<br>tumor<br>(N=33) | G12V<br>Bearing<br>tumor<br>(N=23) | P-value  |
|---------------------------|------------------------------------|------------------------------------|----------|
| Age                       |                                    |                                    |          |
| Median (Range)            | 62 (44-77)                         | 63 (43-79)                         | 0.8395*  |
| <65                       | 20 (61%)                           | 12 (52%)                           | 0.5903†  |
| >65                       | 13 (39%)                           | 11 (48%)                           |          |
| Sex                       |                                    |                                    |          |
| Female                    | 18 (55%)                           | 10 (43%)                           | 0.5875†  |
| Male                      | 15 (45%)                           | 13 (57%)                           |          |
| Race                      |                                    |                                    |          |
| Asian                     | 2 (6%)                             | 3 (13%)                            | 0.6511‡  |
| Black or African American | 2 (6%)                             | 1 (4%)                             |          |
| Caucasian                 | 29 (88%)                           | 19 (83%)                           |          |
| Other                     | 0 (0%)                             | 0 (0%)                             |          |
| Ethnicity                 |                                    |                                    |          |
| Hispanic or Latino        | 0 (0%)                             | 1 (4%)                             | 0.4107†  |
| Not Hispanic or Latino    | 33 (100%)                          | 22 (96%)                           |          |
| ECOG PS                   |                                    |                                    |          |
| 0                         | 15 (45%)                           | 10 (43%)                           | >0.9999† |
| 1                         | 18 (55%)                           | 13 (57%)                           |          |
| 2                         | 0 (0%)                             | 0 (0%)                             |          |
| 3                         | 0 (0%)                             | 0 (0%)                             |          |

\*Mann-Whitney Test (two-sided), †Fisher's Exact Test (two-sided), ‡Chi-square Test (two-sided)

## SOC patients

|                           | G12D<br>Bearing<br>tumor<br>(N=34) | G12V<br>Bearing<br>tumor<br>(N=20) | P-value  |
|---------------------------|------------------------------------|------------------------------------|----------|
| Age                       |                                    |                                    |          |
| Median (Range)            | 65 (38-87)                         | 64 (46-80)                         | 0.5051*  |
| <65                       | 17 (50%)                           | 10 (50%)                           | >0.9999† |
| >65                       | 17 (50%)                           | 10 (50%)                           |          |
| Sex                       |                                    |                                    |          |
| Female                    | 13 (38%)                           | 10 (50%)                           | 0.5694†  |
| Male                      | 21 (62%)                           | 10 (50%)                           |          |
| Race                      |                                    |                                    |          |
| Asian                     | 0 (0%)                             | 0 (0%)                             | 0.6426‡  |
| Black or African American | 2 (6%)                             | 2 (10%)                            |          |
| Caucasian                 | 29 (85%)                           | 15 (75%)                           |          |
| Other                     | 3 (9%)                             | 3 (15%)                            |          |
| Ethnicity                 |                                    |                                    |          |
| Hispanic or Latino        | 0 (0%)                             | 0 (0%)                             | >0.9999† |
| Not Hispanic or Latino    | 34 (100%)                          | 20 (100%)                          |          |
| ECOG PS                   |                                    |                                    |          |
| 0                         | 9 (26%)                            | 2 (10%)                            | 0.3448‡  |
| 1                         | 18 (53%)                           | 15 (75%)                           |          |
| 2                         | 6 (18%)                            | 3 (15%)                            |          |
| 3                         | 1 (3%)                             | 0 (0%)                             |          |

\*Mann-Whitney Test (two-sided), †Fisher's Exact Test (two-sided), ‡Chi-square Test (two-sided)

**Supplementary Table 3.** Of 67 therapy-naïve PRINCE patients (left) who had a *KRAS* variant detected in tissue or plasma, 33 had a *KRAS* G12D and 23 had G12V. Of 54 therapy-naïve SOC patients (right) who had a baseline *KRAS* variant, 34 had *KRAS* G12D and 20 had G12V. All patients shown in these tables are therapy-naïve. ECOG PS refers to Eastern Cooperative Oncology Group Performance Status scale. Source data are provided as a Source Data file.

### A. Sum of Diameters

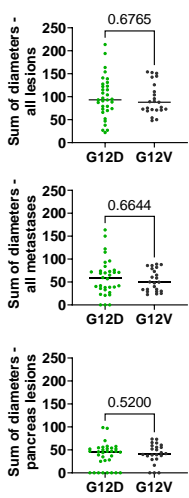

### B. Count of Lesions

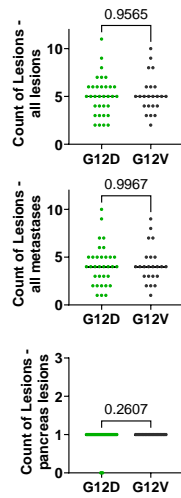

### C. Clinical laboratory values

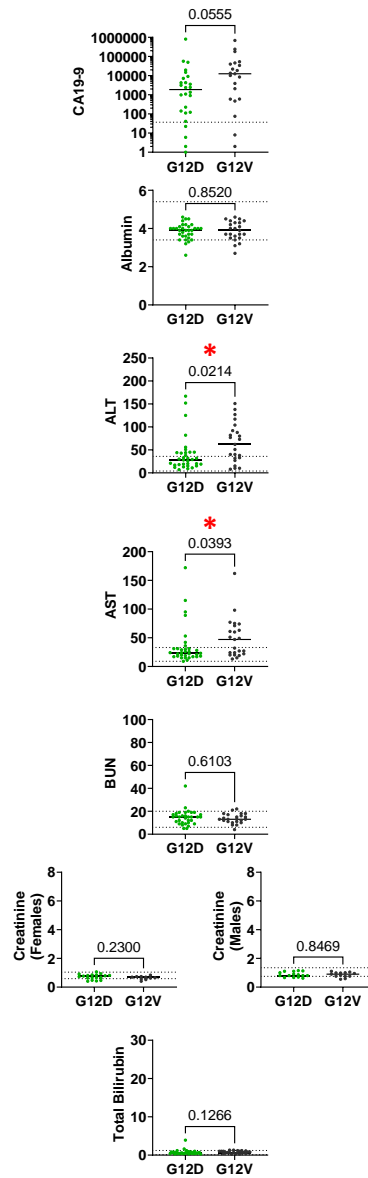

### D. Location of primary tumor

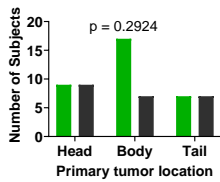

**Supplementary Figure 2. Comparison of clinical variable values for G12D- vs G12V-bearing tumors for therapy-naïve patients in PRINCE cohort.** Shown is analysis of 33 patients with a G12D-bearing tumor and 23 patients with G12V for all variables except CA19-9, for which there were 26 patients with G12D and 21 patients with G12V. A red asterisk \* indicates significance at 0.05. Mann-Whitney test (two-sided) used for all variables other than location of primary tumor, Chi-square test (two-sided). Dotted horizontal lines for clinical laboratory values shown in C indicate upper and lower limits of normal clinical values. Green denotes ctKRAS G12D and dark grey is G12V. Abbreviation ALT (Alanine Transaminase), AST (Aspartate Transaminase), and BUN (Blood Urea Nitrogen) are used. Source data are provided as a Source Data file.



### A. Sum of Diameters

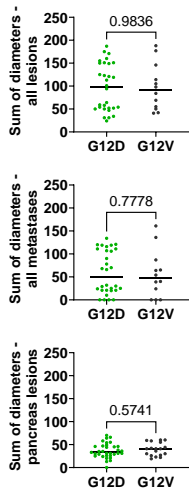

### B. Count of Lesions

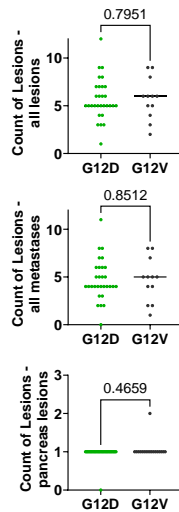

### C. Clinical laboratory values

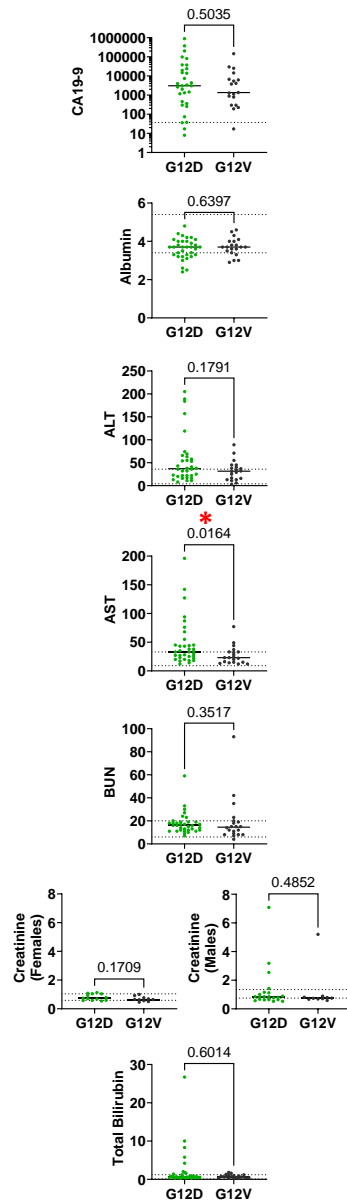

### D. Location of primary tumor

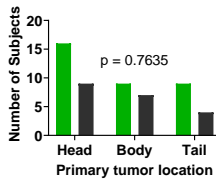

**Supplementary Figure 3. Comparison of clinical variable values for G12D- vs G12V-bearing tumors for patients in SOC cohort.** Not all variables could be collected for all patients. For imaging analysis shown in A and B, measures of pancreatic lesions are shown for 33 patients with a G12D-bearing tumor and for 18 with G12V, all other imaging variables were analyzed for 30 patients with a G12D-bearing tumor and for 12 with G12V. Shown in C, D, and E is analysis of CA19-9 is shown for 31 G12D patients and 19 G12V patients, the remaining variables are shown for 34 patients with a G12D-bearing tumor and for 20 patients with G12V. Mann-Whitney test (two-sided) used for all variables other than location of primary tumor, for which Chi-square test (two-sided) was used. Dotted horizontal lines for clinical laboratory values shown in C indicate upper and lower limits of normal clinical values. Abbreviation ALT (Alanine Transaminase), AST (Aspartate Transaminase), and BUN (Blood Urea Nitrogen) are used. Green denotes ctKRAS G12D and dark grey is G12V. Source data are provided as a Source Data file.

### All PRINCE patients

**A**

**Overall Survival**

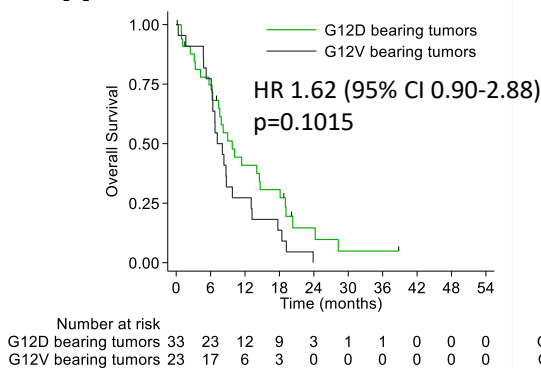

### All SOC patients

**B**

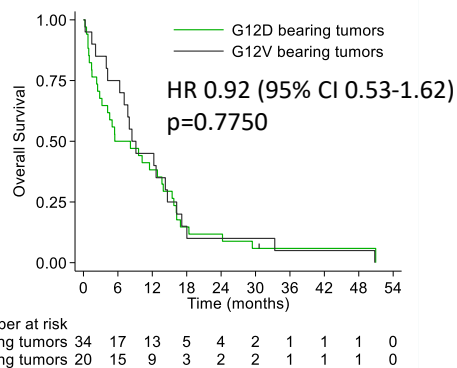

### Combined PRINCE and SOC patients

**C**

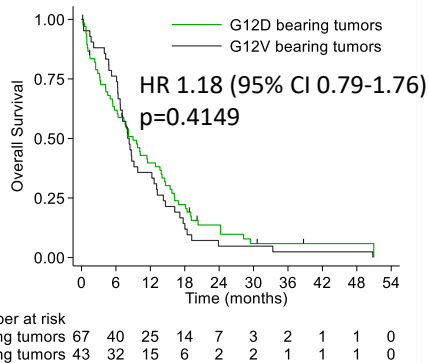

### All PRINCE patients

**D**

**Progression-Free Survival**

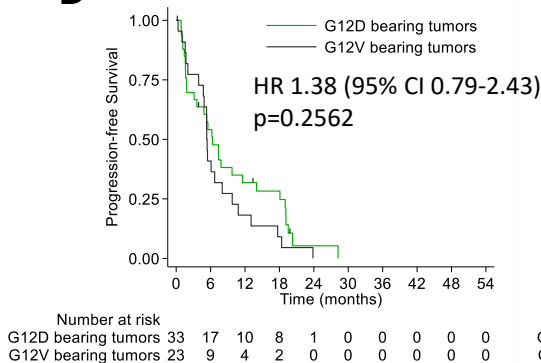

### All SOC patients

**E**

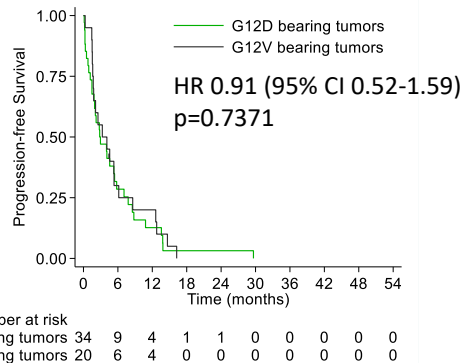

### Combined PRINCE and SOC patients

**F**

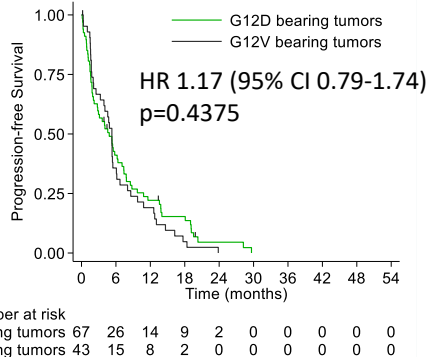

**Supplementary Figure 4.** Association of tumor *KRAS* mutation status (G12D- vs G12V-bearing tumors) with overall survival (A-C) and progression-free survival (D-F) for therapy-naïve patients enrolled in PRINCE trial or who received standard of care (SOC) therapy, or the pooled therapy-naïve PRINCE + SOC cohorts. Cox regression hazard ratios (HR) and 95% confidence intervals (CI) are shown with log-rank p-values. Source data are provided as a Source Data file.

### All PRINCE patients

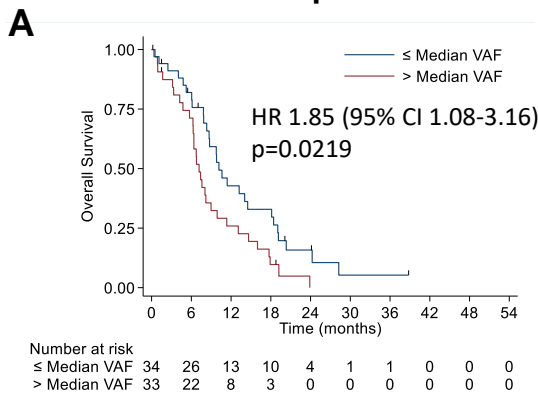

### All SOC patients

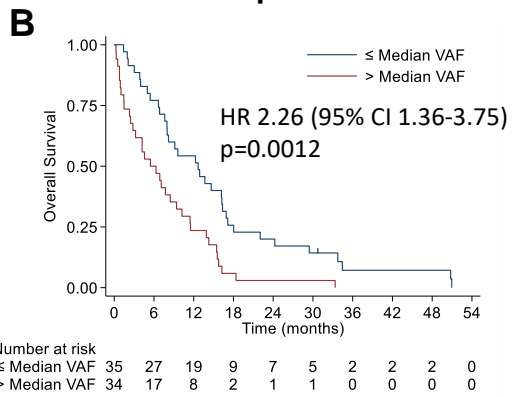

### Combined PRINCE and SOC patients

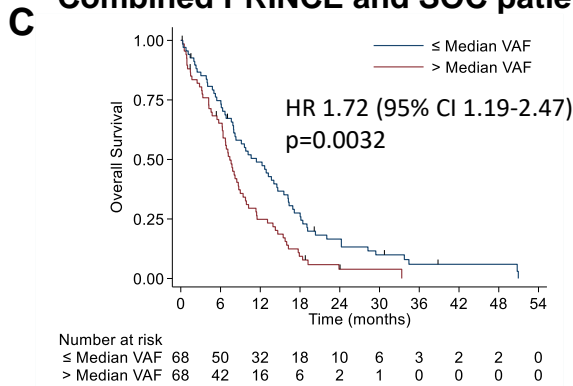

### All PRINCE patients

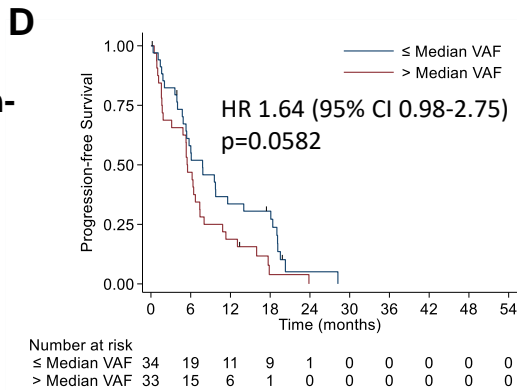

### All SOC patients

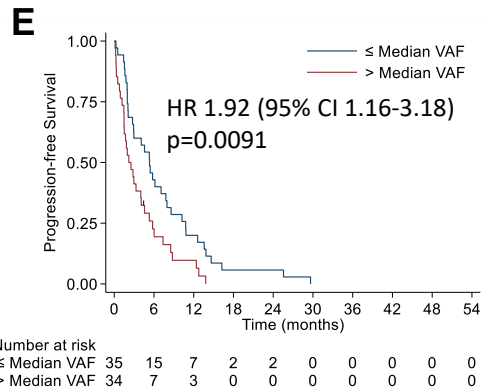

### Combined PRINCE and SOC patients

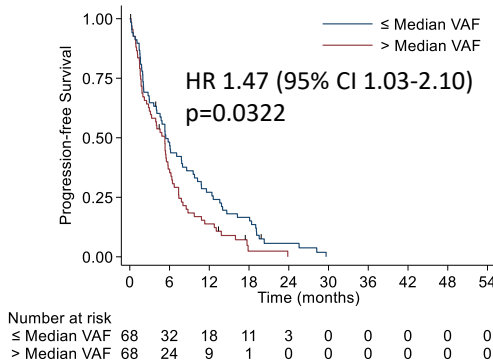

**Supplementary Figure 5.** Baseline plasma ctKRAS variant allele fraction (VAF) dichotomized at the median and associated with survival for therapy-naïve PRINCE patients (A and D, n=67), SOC patients (B and E, n=69) or combined therapy naïve PRINCE and SOC patients (C and F, N =136) with any ctKRAS variant. Overall survival shown in A, B and C, progression-free survival shown in D, E, and F. Cox regression hazard ratios (HR) and 95% confidence intervals (CI) are shown with log-rank p-values. Source data are provided as a Source Data file.

### A. PRINCE Patients

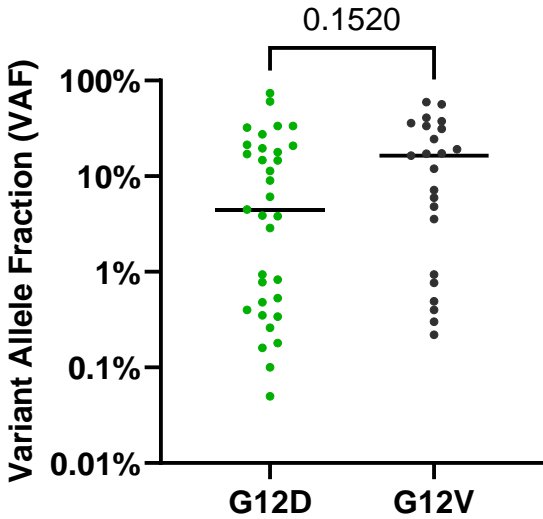

### B. SOC Patients

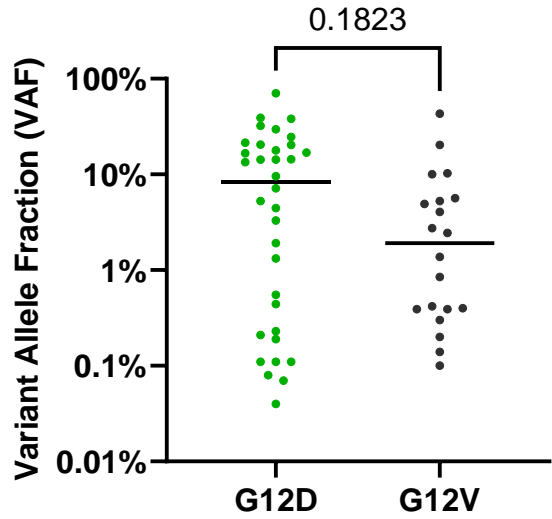

### C. Combined PRINCE and SOC Patients

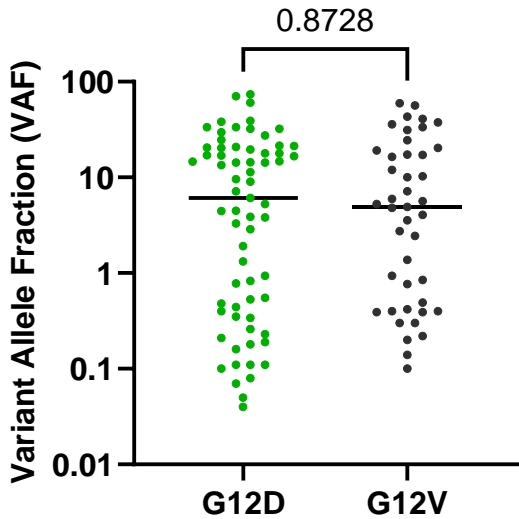

**Supplementary Figure 6.** VAF levels do not differ significantly in therapy-naïve patients between ctKRAS G12D and ctKRAS G12V (Mann-Whitney test, two-sided) in the A) PRINCE (n=33, and 23, respectively) or B) standard of care (SOC, n=34, and 20, respectively) cohorts. Shown in C) is the pooled therapy-naïve PRINCE and SOC cohort. (n=67, and 43, respectively). Green denotes ctKRAS G12D and dark gray is G12V. Source data are provided as a Source Data file.

|     |                      | PRINCE Patients         |              |                         |              |                   |         |                   |         |
|-----|----------------------|-------------------------|--------------|-------------------------|--------------|-------------------|---------|-------------------|---------|
|     |                      | G12D (n=33)             |              |                         |              | G12V (n=23)       |         |                   |         |
|     |                      | Univariate              |              | Multivariate            |              | Univariate        |         | Multivariate      |         |
|     |                      | HR [95% CI]             | p-value      | HR [95% CI]             | p-value      | HR [95% CI]       | p-value | HR [95% CI]       | p-value |
| OS  | logVAF               | <b>1.59 [1.01-2.51]</b> | <b>0.046</b> | <b>1.98 [1.10-3.56]</b> | <b>0.022</b> | 0.92 [0.54-1.57]  | 0.765   | 1.10 [0.57-2.11]  | 0.781   |
|     | Age                  | 0.97 [0.92-1.01]        | 0.145        | 0.98 [0.94-1.03]        | 0.534        | 1.05 [1.00-1.11]  | 0.072   | 1.03 [0.96-1.10]  | 0.404   |
|     | Sex                  | 1.95 [0.89-4.27]        | 0.093        | 2.42 [0.99-5.93]        | 0.053        | 0.38 [0.14-1.02]  | 0.056   | 0.51 [0.14-1.78]  | 0.290   |
|     | ECOG PS <sup>1</sup> | 1.33 [0.61-2.90]        | 0.481        | 1.21 [0.55-2.68]        | 0.631        | 1.71 [0.66-4.41]  | 0.270   | 1.67 [0.57-4.95]  | 0.352   |
|     | logSOD <sup>2</sup>  | 1.43 [0.27-7.70]        | 0.676        | 0.23 [0.03-1.94]        | 0.176        | 1.12 [0.03-41.68] | 0.952   | 0.74 [0.01-56.54] | 0.891   |
| PFS | logVAF               | <b>1.74 [1.11-2.73]</b> | <b>0.017</b> | <b>2.14 [1.22-3.76]</b> | <b>0.008</b> | 1.00 [0.61-1.64]  | 0.991   | 1.24 [0.68-2.26]  | 0.489   |
|     | Age                  | 0.95 [0.91-1.00]        | 0.058        | 0.97 [0.92-1.02]        | 0.245        | 1.05 [0.99-1.12]  | 0.081   | 1.03 [0.95-1.10]  | 0.492   |
|     | Sex                  | 2.01 [0.95-4.26]        | 0.069        | <b>2.40 [1.02-5.62]</b> | <b>0.045</b> | 0.46 [0.18-1.13]  | 0.090   | 0.52 [0.16-1.62]  | 0.258   |
|     | ECOG PS <sup>1</sup> | 1.14 [0.55-2.39]        | 0.723        | 1.08 [0.51-2.30]        | 0.842        | 1.75 [0.70-4.37]  | 0.232   | 1.80 [0.60-5.36]  | 0.294   |
|     | logSOD <sup>2</sup>  | 1.66 [0.31-8.80]        | 0.552        | 0.21 [0.03-1.63]        | 0.135        | 1.39 [0.04-49.62] | 0.858   | 0.76 [0.02-30.28] | 0.884   |

|     |                      | SOC Patients            |              |                         |              |                         |              |                          |              |
|-----|----------------------|-------------------------|--------------|-------------------------|--------------|-------------------------|--------------|--------------------------|--------------|
|     |                      | G12D (n=31)             |              |                         |              | G12V (n=19)             |              |                          |              |
|     |                      | Univariate              |              | Multivariate            |              | Univariate              |              | Multivariate             |              |
|     |                      | HR [95% CI]             | p-value      | HR [95% CI]             | p-value      | HR [95% CI]             | p-value      | HR [95% CI]              | p-value      |
| OS  | logVAF               | <b>2.03 [1.31-3.15]</b> | <b>0.001</b> | <b>2.43 [1.42-4.16]</b> | <b>0.001</b> | 1.41 [0.70-2.86]        | 0.336        | 2.08 [0.92-4.71]         | 0.078        |
|     | Age                  | 1.02 [0.98-1.06]        | 0.243        | <b>1.06 [1.01-1.11]</b> | <b>0.011</b> | 1.00 [0.95-1.06]        | 0.855        | 1.01 [0.94-1.08]         | 0.876        |
|     | Sex                  | 1.62 [0.75-3.50]        | 0.220        | <b>3.09 [1.28-7.45]</b> | <b>0.012</b> | 0.60 [0.23-1.58]        | 0.299        | 0.33 [0.08-1.41]         | 0.134        |
|     | ECOG PS <sup>1</sup> | <b>2.11 [1.30-3.43]</b> | <b>0.003</b> | <b>2.43 [1.33-4.44]</b> | <b>0.004</b> | <b>3.16 [1.12-8.87]</b> | <b>0.029</b> | <b>4.26 [1.12-16.18]</b> | <b>0.033</b> |
|     | logCA19-9            | 1.27 [0.94-1.72]        | 0.114        | 0.88 [0.63-1.23]        | 0.458        | 0.86 [0.44-1.68]        | 0.656        | 1.36 [0.52-3.54]         | 0.532        |
| PFS | logVAF               | <b>1.58 [1.08-2.32]</b> | <b>0.020</b> | <b>1.73 [1.14-2.63]</b> | <b>0.010</b> | 1.90 [0.99-3.64]        | 0.054        | 1.64 [0.80-3.38]         | 0.179        |
|     | Age                  | 1.03 [0.99-1.07]        | 0.154        | <b>1.05 [1.01-1.10]</b> | <b>0.025</b> | 0.97 [0.92-1.03]        | 0.336        | 0.97 [0.90-1.05]         | 0.414        |
|     | Sex                  | 2.00 [0.86-4.65]        | 0.106        | <b>3.18 [1.22-8.28]</b> | <b>0.018</b> | 1.30 [0.51-3.34]        | 0.581        | 1.71 [0.46-6.42]         | 0.427        |
|     | ECOG PS <sup>1</sup> | 1.46 [0.93-2.30]        | 0.097        | 1.28 [0.78-2.11]        | 0.327        | 2.48 [0.57-10.79]       | 0.226        | 2.51 [0.50-12.55]        | 0.261        |
|     | logCA19-9            | 1.13 [0.82-1.56]        | 0.439        | 0.89 [0.63-1.28]        | 0.534        | 1.01 [0.53-1.93]        | 0.981        | 0.78 [0.33-1.83]         | 0.570        |

|     |                      | Combined PRINCE and SOC Patients |              |                         |               |                         |              |                   |         |
|-----|----------------------|----------------------------------|--------------|-------------------------|---------------|-------------------------|--------------|-------------------|---------|
|     |                      | G12D (n=53)                      |              |                         |               | G12V (n=32)             |              |                   |         |
|     |                      | Univariate                       |              | Multivariate            |               | Univariate              |              | Multivariate      |         |
|     |                      | HR [95% CI]                      | p-value      | HR [95% CI]             | p-value       | HR [95% CI]             | p-value      | HR [95% CI]       | p-value |
| OS  | logVAF               | <b>1.77 [1.27-2.48]</b>          | <b>0.001</b> | <b>2.27 [1.44-3.60]</b> | <b>0.0002</b> | 1.06 [0.66-1.69]        | 0.810        | 1.41 [0.79-2.53]  | 0.245   |
|     | Age                  | 1.00 [0.97-1.03]                 | 0.998        | 1.03 [0.99-1.07]        | 0.116         | 1.05 [1.00-1.09]        | 0.053        | 1.03 [0.97-1.09]  | 0.323   |
|     | Sex                  | <b>1.97 [1.08-3.57]</b>          | <b>0.026</b> | <b>3.31 [1.53-7.17]</b> | <b>0.002</b>  | <b>0.42 [0.20-0.92]</b> | <b>0.029</b> | 0.50 [0.20-1.24]  | 0.135   |
|     | ECOG PS <sup>1</sup> | <b>1.92 [1.23-2.97]</b>          | <b>0.004</b> | <b>1.70 [1.05-2.74]</b> | <b>0.030</b>  | <b>1.89 [1.00-3.54]</b> | <b>0.049</b> | 2.28 [0.98-5.30]  | 0.055   |
|     | logSOD <sup>2</sup>  | <b>3.44 [1.07-11.04]</b>         | <b>0.038</b> | 0.43 [0.09-2.13]        | 0.303         | 2.95 [0.23-37.35]       | 0.404        | 0.23 [0.01-5.30]  | 0.355   |
|     | logCA19-9            | 1.21 [0.97-1.52]                 | 0.092        | 1.04 [0.84-1.29]        | 0.717         | 0.80 [0.57-1.13]        | 0.206        | 0.92 [0.61-1.39]  | 0.690   |
| PFS | logVAF               | <b>1.65 [1.18-2.30]</b>          | <b>0.003</b> | <b>2.05 [1.35-3.10]</b> | <b>0.001</b>  | 0.96 [0.64-1.45]        | 0.854        | 1.25 [0.77-2.03]  | 0.357   |
|     | Age                  | 1.00 [0.97-1.03]                 | 0.920        | 1.02 [0.99-1.06]        | 0.253         | 1.05 [1.00-1.10]        | 0.069        | 1.03 [0.98-1.09]  | 0.274   |
|     | Sex                  | <b>2.30 [1.26-4.19]</b>          | <b>0.006</b> | <b>3.27 [1.58-6.78]</b> | <b>0.001</b>  | 0.59 [0.28-1.24]        | 0.165        | 1.10 [0.42-2.88]  | 0.847   |
|     | ECOG PS <sup>1</sup> | 1.40 [0.92-2.14]                 | 0.120        | 1.25 [0.78-2.00]        | 0.346         | <b>2.17 [1.05-4.49]</b> | <b>0.037</b> | 1.98 [0.89-4.41]  | 0.096   |
|     | logSOD <sup>2</sup>  | 2.50 [0.81-7.77]                 | 0.112        | 0.45 [0.10-1.95]        | 0.285         | 2.42 [0.18-32.77]       | 0.506        | 1.02 [0.06-17.89] | 0.992   |
|     | logCA19-9            | 1.15 [0.92-1.42]                 | 0.218        | 1.00 [0.81-1.24]        | 0.972         | <b>0.70 [0.50-0.98]</b> | <b>0.038</b> | 0.66 [0.42-1.04]  | 0.071   |

<sup>1</sup>ECOG PS = Eastern Cooperative Oncology Group Performance Status

<sup>2</sup>SOD = Sum of diameters for all target lesions

**Supplementary Table 4.** Cox analysis for baseline plasma log ctKRAS variant allele fraction (VAF) as a continuous variable for therapy-naïve PRINCE (top table), standard of care (SOC, middle table), and combined therapy-naïve PRINCE and SOC (bottom table), with results for ctKRAS G12D on left and for G12V on right. CA19-9 excluded from PRINCE and sum of diameters (SOD) excluded from SOC cohort due to incomplete data. Of the 33 and 31 patients analyzed in the PRINCE and SOC tables respectively for G12D, only the 53 patients with both CA19-9 and SOD values available were included in combined cohort (bottom table). Significant values (without adjustment for multiple testing) indicated by bolded red text. Source data are provided as a Source Data file.

## Combined PRINCE and SOC patients

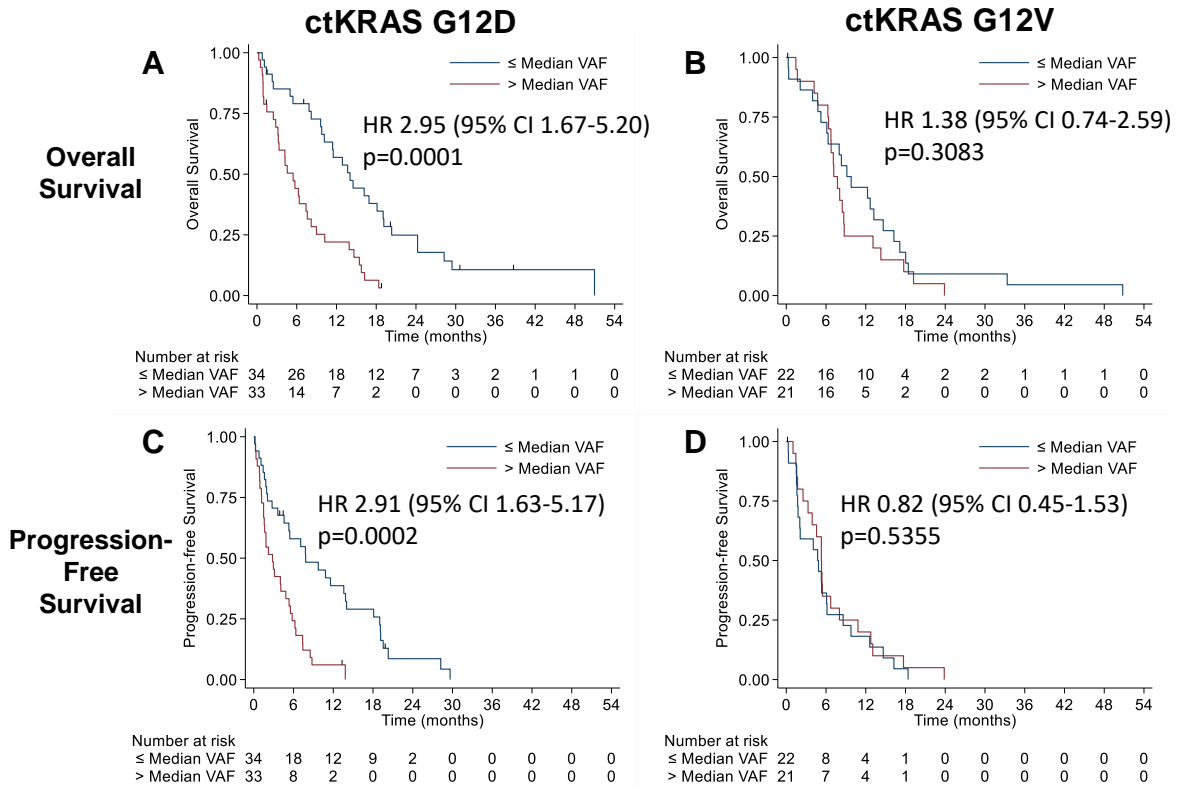

**Supplementary Figure 7. Survival association for baseline ctKRAS variant allele fraction (VAF) by variant for therapy-naïve combined PRINCE and standard of care(SOC) patients.** Shown are the Kaplan-Meier curves for baseline VAF dichotomized at the median for overall survival (top, A and B) and progression-free survival (bottom, C and D) for patients with G12D- (left, A and C) or G12V-bearing tumors (right, B and D). Cox regression hazard ratios (HR) and 95% confidence intervals (CI) are shown with log-rank p-values. Source data are provided as a Source Data file.

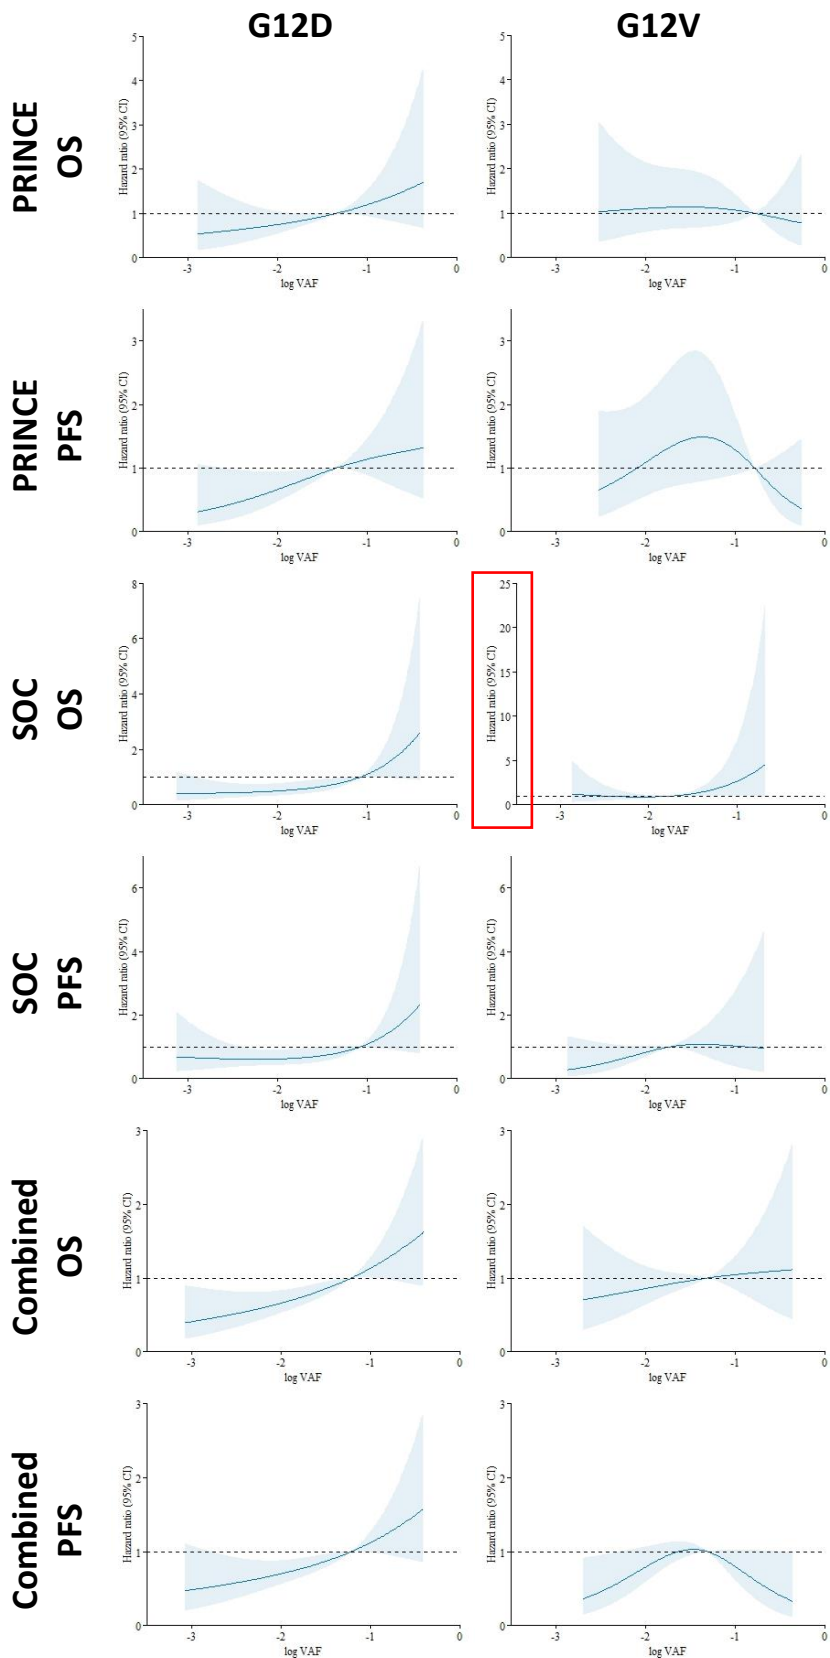

**Supplementary Figure 8. Estimated cubic spline functions relating log ctKRAS variant allele fraction (VAF) to results of the Cox models.** Results for overall survival (OS) and progression-free survival (PFS) shown for PRINCE (top two rows), standard of care (SOC, middle two rows), and combined PRINCE and SOC patients (bottom two rows). The left column shows results for ctKRAS G12D only, and the right column for ctKRAS G12V only. Red box indicates y-axis maximum for G12V is different than for G12D for the SOC Overall Survival functions. Source data are provided as a Source Data file.

| Survival | LoD   | G12D                                       |  | G12V                                |  |
|----------|-------|--------------------------------------------|--|-------------------------------------|--|
| OS       | 0.04% | <b>HR 2.95 (95% CI 1.67-5.20) p=0.0001</b> |  | HR 1.38 (95% CI 0.74-2.59) p=0.3083 |  |
|          | 0.10% | <b>HR 2.62 (95% CI 1.47-4.66) p=0.0007</b> |  | HR 1.38 (95% CI 0.74-2.59) p=0.3083 |  |
|          | 0.25% | <b>HR 1.98 (95% CI 1.08-3.62) p=0.0244</b> |  | HR 1.31 (95% CI 0.68-2.53) p=0.4203 |  |
| PFS      | 0.04% | <b>HR 2.91 (95% CI 1.63-5.17) p=0.0002</b> |  | HR 0.82 (95% CI 0.45-1.53) p=0.5355 |  |
|          | 0.10% | <b>HR 2.86 (95% CI 1.58-5.20) p=0.0003</b> |  | HR 0.82 (95% CI 0.45-1.53) p=0.5355 |  |
|          | 0.25% | HR 1.80 (95% CI 0.97-3.34) p=0.058         |  | HR 0.66 (95% CI 0.34-1.28) p=0.209  |  |

| LoD = 0.04% | G12D N=53           |                          |              |                         |              | G12V N=32               |              |                   |         |  |
|-------------|---------------------|--------------------------|--------------|-------------------------|--------------|-------------------------|--------------|-------------------|---------|--|
|             | Variable            | Univariate               |              | Multivariate            |              | Univariate              |              | Multivariate      |         |  |
|             |                     | HR [95% CI]              | p-value      | HR [95% CI]             | p-value      | HR [95% CI]             | p-value      | HR [95% CI]       | p-value |  |
| OS          | logVAF              | <b>1.77 [1.27-2.48]</b>  | <b>0.001</b> | <b>2.27 [1.44-3.60]</b> | <b>0.000</b> | 1.06 [0.66-1.69]        | 0.810        | 1.41 [0.79-2.53]  | 0.245   |  |
|             | Age                 | 1.00 [0.97-1.03]         | 0.998        | 1.03 [0.99-1.07]        | 0.116        | 1.05 [1.00-1.09]        | 0.053        | 1.03 [0.97-1.09]  | 0.323   |  |
|             | Sex                 | <b>1.97 [1.08-3.57]</b>  | <b>0.026</b> | <b>3.31 [1.53-7.17]</b> | <b>0.002</b> | <b>0.42 [0.20-0.92]</b> | <b>0.029</b> | 0.50 [0.20-1.24]  | 0.135   |  |
|             | ECOGPS <sup>1</sup> | <b>1.92 [1.23-2.97]</b>  | <b>0.004</b> | <b>1.70 [1.05-2.74]</b> | <b>0.030</b> | <b>1.89 [1.00-3.54]</b> | <b>0.049</b> | 2.28 [0.98-5.30]  | 0.055   |  |
|             | logSOD <sup>2</sup> | <b>3.44 [1.07-11.04]</b> | <b>0.038</b> | 0.43 [0.09-2.13]        | 0.303        | 2.95 [0.23-37.35]       | 0.404        | 0.23 [0.01-5.30]  | 0.355   |  |
|             | logCA19-9           | 1.21 [0.97-1.52]         | 0.092        | 1.04 [0.84-1.29]        | 0.717        | 0.80 [0.57-1.13]        | 0.206        | 0.92 [0.61-1.39]  | 0.690   |  |
| PFS         | logVAF              | <b>1.65 [1.18-2.30]</b>  | <b>0.003</b> | <b>2.05 [1.35-3.10]</b> | <b>0.001</b> | 0.96 [0.64-1.45]        | 0.854        | 1.25 [0.77-2.03]  | 0.357   |  |
|             | Age                 | 1.00 [0.97-1.03]         | 0.920        | 1.02 [0.99-1.06]        | 0.253        | 1.05 [1.00-1.10]        | 0.069        | 1.03 [0.98-1.09]  | 0.274   |  |
|             | Sex                 | <b>2.30 [1.26-4.19]</b>  | <b>0.006</b> | <b>3.27 [1.58-6.78]</b> | <b>0.001</b> | 0.59 [0.28-1.24]        | 0.165        | 1.10 [0.42-2.88]  | 0.847   |  |
|             | ECOGPS <sup>1</sup> | 1.40 [0.92-2.14]         | 0.120        | 1.25 [0.78-2.00]        | 0.346        | <b>2.17 [1.05-4.49]</b> | <b>0.037</b> | 1.98 [0.89-4.41]  | 0.096   |  |
|             | logSOD <sup>2</sup> | 2.50 [0.81-7.77]         | 0.112        | 0.45 [0.10-1.95]        | 0.285        | 2.42 [0.18-32.77]       | 0.506        | 1.02 [0.06-17.89] | 0.992   |  |
|             | logCA19-9           | 1.15 [0.92-1.42]         | 0.218        | 1.00 [0.81-1.24]        | 0.972        | <b>0.70 [0.50-0.98]</b> | <b>0.038</b> | 0.66 [0.42-1.04]  | 0.071   |  |

| LoD = 0.10% | G12D N=50           |                         |              |                         |              | G12V N=32               |              |                   |         |  |
|-------------|---------------------|-------------------------|--------------|-------------------------|--------------|-------------------------|--------------|-------------------|---------|--|
|             | Variable            | Univariate              |              | Multivariate            |              | Univariate              |              | Multivariate      |         |  |
|             |                     | HR [95% CI]             | p-value      | HR [95% CI]             | p-value      | HR [95% CI]             | p-value      | HR [95% CI]       | p-value |  |
| OS          | logVAF              | <b>1.71 [1.18-2.47]</b> | <b>0.004</b> | <b>2.22 [1.38-3.58]</b> | <b>0.001</b> | 1.06 [0.66-1.69]        | 0.810        | 1.41 [0.79-2.53]  | 0.245   |  |
|             | Age                 | 1.00 [0.97-1.03]        | 0.939        | 1.03 [0.99-1.07]        | 0.135        | 1.05 [1.00-1.09]        | 0.053        | 1.03 [0.97-1.09]  | 0.323   |  |
|             | Sex                 | <b>1.99 [1.08-3.67]</b> | <b>0.028</b> | <b>3.31 [1.50-7.30]</b> | <b>0.003</b> | <b>0.42 [0.20-0.92]</b> | <b>0.029</b> | 0.50 [0.20-1.24]  | 0.135   |  |
|             | ECOGPS <sup>1</sup> | <b>1.77 [1.11-2.81]</b> | <b>0.016</b> | <b>1.70 [1.03-2.79]</b> | <b>0.037</b> | <b>1.89 [1.00-3.54]</b> | <b>0.049</b> | 2.28 [0.98-5.30]  | 0.055   |  |
|             | logSOD <sup>2</sup> | 2.67 [0.77-9.20]        | 0.121        | 0.48 [0.10-2.40]        | 0.375        | 2.95 [0.23-37.35]       | 0.404        | 0.23 [0.01-5.30]  | 0.355   |  |
|             | logCA19-9           | 1.15 [0.92-1.44]        | 0.231        | 1.03 [0.82-1.28]        | 0.825        | 0.80 [0.57-1.13]        | 0.206        | 0.92 [0.61-1.39]  | 0.690   |  |
| PFS         | logVAF              | <b>1.68 [1.16-2.42]</b> | <b>0.006</b> | <b>2.15 [1.38-3.34]</b> | <b>0.001</b> | 0.96 [0.64-1.45]        | 0.854        | 1.25 [0.77-2.03]  | 0.357   |  |
|             | Age                 | 1.00 [0.97-1.03]        | 0.790        | 1.02 [0.98-1.05]        | 0.360        | 1.05 [1.00-1.10]        | 0.069        | 1.03 [0.98-1.09]  | 0.274   |  |
|             | Sex                 | <b>2.10 [1.14-3.87]</b> | <b>0.017</b> | <b>3.12 [1.49-6.57]</b> | <b>0.003</b> | 0.59 [0.28-1.24]        | 0.165        | 1.10 [0.42-2.88]  | 0.847   |  |
|             | ECOGPS <sup>1</sup> | 1.34 [0.86-2.09]        | 0.198        | 1.33 [0.81-2.17]        | 0.259        | <b>2.17 [1.05-4.49]</b> | <b>0.037</b> | 1.98 [0.89-4.41]  | 0.096   |  |
|             | logSOD <sup>2</sup> | 1.99 [0.58-6.82]        | 0.273        | 0.46 [0.10-2.07]        | 0.313        | 2.42 [0.18-32.77]       | 0.506        | 1.02 [0.06-17.89] | 0.992   |  |
|             | logCA19-9           | 1.11 [0.89-1.38]        | 0.374        | 1.00 [0.81-1.25]        | 0.973        | <b>0.70 [0.50-0.98]</b> | <b>0.038</b> | 0.66 [0.42-1.04]  | 0.071   |  |

| LoD = 0.25% | G12D N=43           |                         |              |                         |              | G12V N=30               |              |                         |              |  |
|-------------|---------------------|-------------------------|--------------|-------------------------|--------------|-------------------------|--------------|-------------------------|--------------|--|
|             | Variable            | Univariate              |              | Multivariate            |              | Univariate              |              | Multivariate            |              |  |
|             |                     | HR [95% CI]             | p-value      | HR [95% CI]             | p-value      | HR [95% CI]             | p-value      | HR [95% CI]             | p-value      |  |
| OS          | logVAF              | <b>1.68 [1.02-2.79]</b> | <b>0.042</b> | <b>2.08 [1.18-3.66]</b> | <b>0.011</b> | 0.93 [0.53-1.64]        | 0.806        | 1.47 [0.71-3.03]        | 0.303        |  |
|             | Age                 | 1.00 [0.97-1.03]        | 0.987        | 1.03 [0.99-1.07]        | 0.149        | 1.04 [0.99-1.09]        | 0.118        | 1.03 [0.97-1.09]        | 0.316        |  |
|             | Sex                 | <b>2.21 [1.14-4.29]</b> | <b>0.020</b> | <b>3.25 [1.40-7.51]</b> | <b>0.006</b> | 0.47 [0.22-1.04]        | 0.061        | 0.50 [0.20-1.27]        | 0.146        |  |
|             | ECOGPS <sup>1</sup> | 1.54 [0.82-2.89]        | 0.182        | 1.59 [0.84-3.01]        | 0.158        | 1.68 [0.88-3.20]        | 0.115        | 2.28 [0.93-5.58]        | 0.071        |  |
|             | logSOD <sup>2</sup> | 1.45 [0.35-6.00]        | 0.605        | 0.38 [0.07-2.07]        | 0.262        | 2.69 [0.23-31.97]       | 0.433        | 0.19 [0.01-5.19]        | 0.328        |  |
|             | logCA19-9           | 1.08 [0.86-1.36]        | 0.493        | 1.02 [0.81-1.28]        | 0.882        | 0.80 [0.57-1.12]        | 0.201        | 0.96 [0.63-1.45]        | 0.840        |  |
| PFS         | logVAF              | <b>1.76 [1.05-2.95]</b> | <b>0.031</b> | <b>1.98 [1.15-3.43]</b> | <b>0.014</b> | 0.81 [0.50-1.32]        | 0.390        | 0.95 [0.48-1.88]        | 0.888        |  |
|             | Age                 | 1.00 [0.96-1.03]        | 0.805        | 1.02 [0.98-1.06]        | 0.298        | 1.03 [0.98-1.09]        | 0.214        | 1.01 [0.95-1.08]        | 0.689        |  |
|             | Sex                 | <b>2.45 [1.26-4.76]</b> | <b>0.008</b> | <b>3.21 [1.42-7.27]</b> | <b>0.005</b> | 0.70 [0.33-1.51]        | 0.366        | 1.45 [0.48-4.34]        | 0.511        |  |
|             | ECOGPS <sup>1</sup> | 1.32 [0.71-2.44]        | 0.380        | 1.42 [0.75-2.67]        | 0.283        | 1.78 [0.85-3.71]        | 0.126        | 1.48 [0.59-3.70]        | 0.399        |  |
|             | logSOD <sup>2</sup> | 1.58 [0.36-6.93]        | 0.543        | 0.48 [0.09-2.73]        | 0.410        | 2.12 [0.17-27.14]       | 0.564        | 1.53 [0.07-32.84]       | 0.787        |  |
|             | logCA19-9           | 1.06 [0.85-1.33]        | 0.597        | 0.99 [0.79-1.25]        | 0.957        | <b>0.68 [0.48-0.96]</b> | <b>0.027</b> | <b>0.62 [0.38-1.02]</b> | <b>0.060</b> |  |

<sup>1</sup>ECOG PS = Eastern Cooperative Oncology Group Performance Status  
<sup>2</sup>SOD = Sum of diameters for all target lesions

**Supplementary Table 5. Sensitivity analysis for LoDs (Limits of Detection) of 0.04% (as used for our assay, see Methods), 0.10%, and 0.25% for combined PRINCE and standard of care (SOC) cohorts.** Shown in the top table are survival associations (hazard ratios, HR, with 95% confidence intervals (CI), and log-rank p-values) for baseline ctKRAS variant allele fraction (VAF) by variant (G12D on left and G12V on right) at the three LoDs. In the bottom table, Cox analysis is shown for baseline ctKRAS log of variant allele fraction (VAF) as a continuous variable for overall survival (OS) and progression-free survival (PFS), in each table. Significant values (without adjustment for multiple testing) indicated by bolded red text. Source data are provided as a Source Data file.



## All PRINCE patients

## All SOC patients

**A**

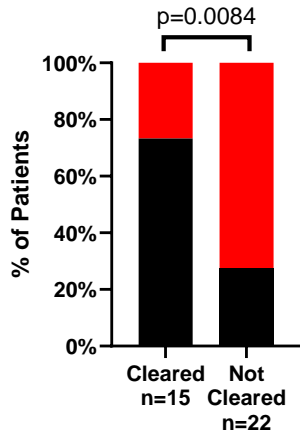

**B**

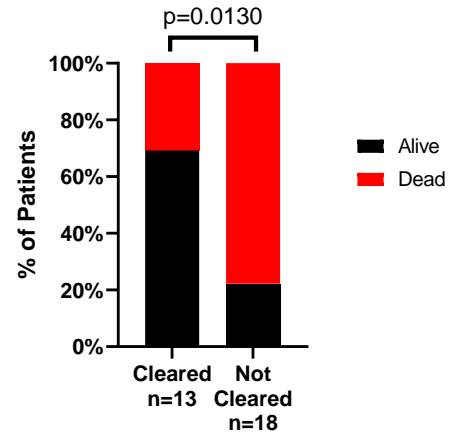

**C**

**Overall Survival**

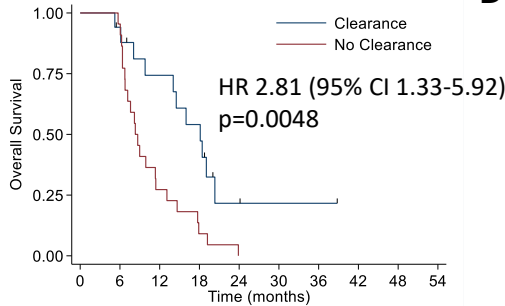

| Number at risk | 0  | 6  | 12 | 18 | 24 | 30 | 36 | 42 | 48 | 54 |
|----------------|----|----|----|----|----|----|----|----|----|----|
| Clearance      | 17 | 15 | 11 | 8  | 2  | 1  | 1  | 0  | 0  | 0  |
| No Clearance   | 22 | 21 | 6  | 2  | 0  | 0  | 0  | 0  | 0  | 0  |

**D**

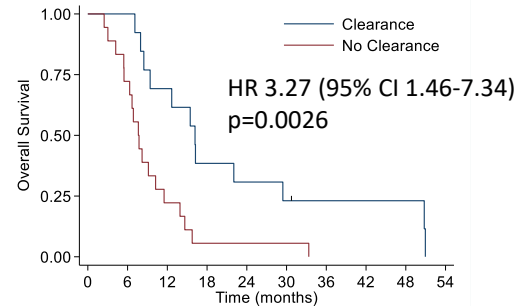

| Number at risk | 0  | 6  | 12 | 18 | 24 | 30 | 36 | 42 | 48 | 54 |
|----------------|----|----|----|----|----|----|----|----|----|----|
| Clearance      | 13 | 13 | 9  | 5  | 4  | 3  | 2  | 2  | 2  | 0  |
| No Clearance   | 18 | 13 | 4  | 1  | 1  | 1  | 0  | 0  | 0  | 0  |

**E**

**Progression-Free Survival**

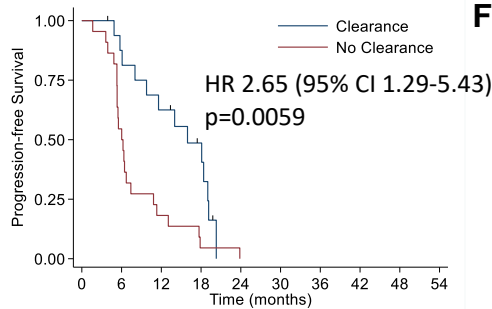

| Number at risk | 0  | 6  | 12 | 18 | 24 | 30 | 36 | 42 | 48 | 54 |
|----------------|----|----|----|----|----|----|----|----|----|----|
| Clearance      | 17 | 14 | 10 | 6  | 0  | 0  | 0  | 0  | 0  | 0  |
| No Clearance   | 22 | 12 | 4  | 1  | 0  | 0  | 0  | 0  | 0  | 0  |

**F**

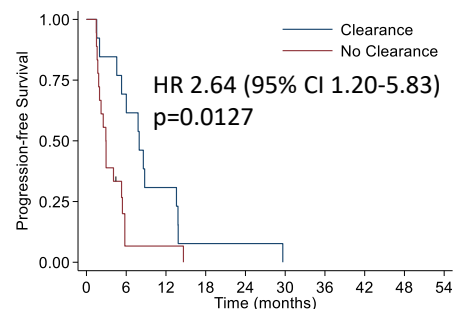

| Number at risk | 0  | 6 | 12 | 18 | 24 | 30 | 36 | 42 | 48 | 54 |
|----------------|----|---|----|----|----|----|----|----|----|----|
| Clearance      | 13 | 9 | 4  | 1  | 1  | 0  | 0  | 0  | 0  | 0  |
| No Clearance   | 18 | 1 | 1  | 0  | 0  | 0  | 0  | 0  | 0  | 0  |

**Supplementary Figure 9. ctKRAS clearance and association with survival for all therapy-naïve PRINCE and standard of care (SOC) patients with any ctKRAS variant detected.** Includes (A, C, and E) all PRINCE patients, and (B, D, and F) SOC patients. Shown at top (A and B) is ctKRAS clearance at week 8 on therapy for all patients with one-year survival data (alive or dead at one year) (Fisher's Exact Test, two-sided), in the middle (C and D) is Kaplan-Meier analysis for overall survival and on bottom (E and F) is progression-free survival. Cox regression hazard ratios (HR) and 95% confidence intervals (CI) are shown with log-rank p-values. Source data are provided as a Source Data file.

# All Combined PRINCE and SOC Patients

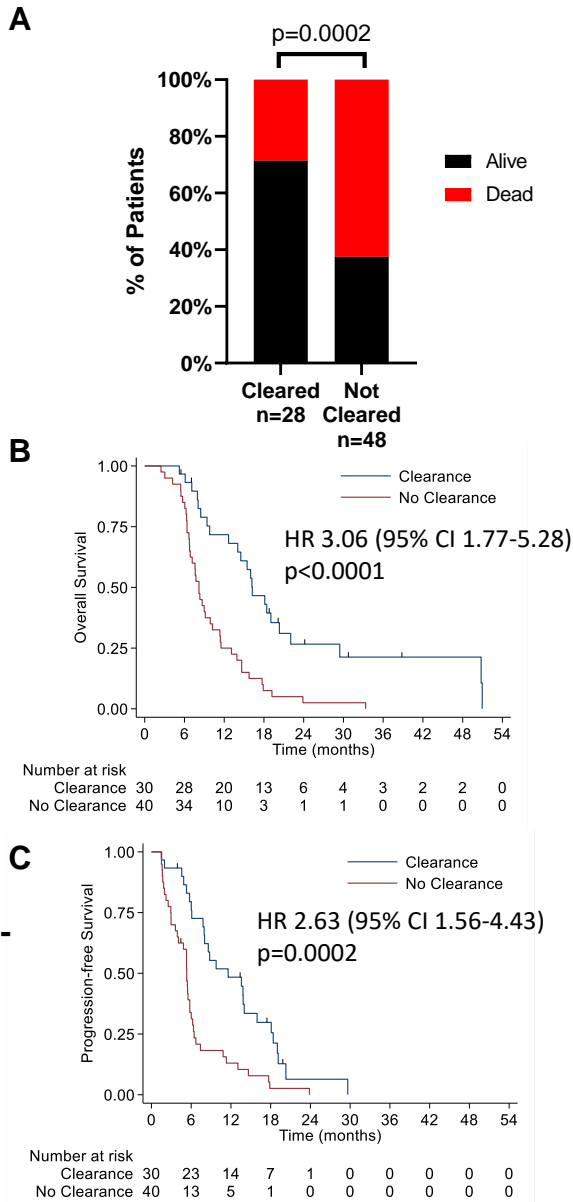

**Supplementary Figure 10. ctKRAS clearance and association with survival for combined therapy-naïve PRINCE and standard of care (SOC) patients with any ctKRAS variant detected.** Shown at top (A) is ctKRAS clearance at week 8 on therapy for all patients with one-year survival data (alive or dead at one year) (Fisher's Exact Test, two-sided), in the middle (B) is Kaplan-Meier analysis for overall survival and on bottom (C) is progression-free survival. Cox regression hazard ratios (HR) and 95% confidence intervals (CI) are shown with log-rank p-values. Source data are provided as a Source Data file.

# Combined PRINCE and SOC Patients

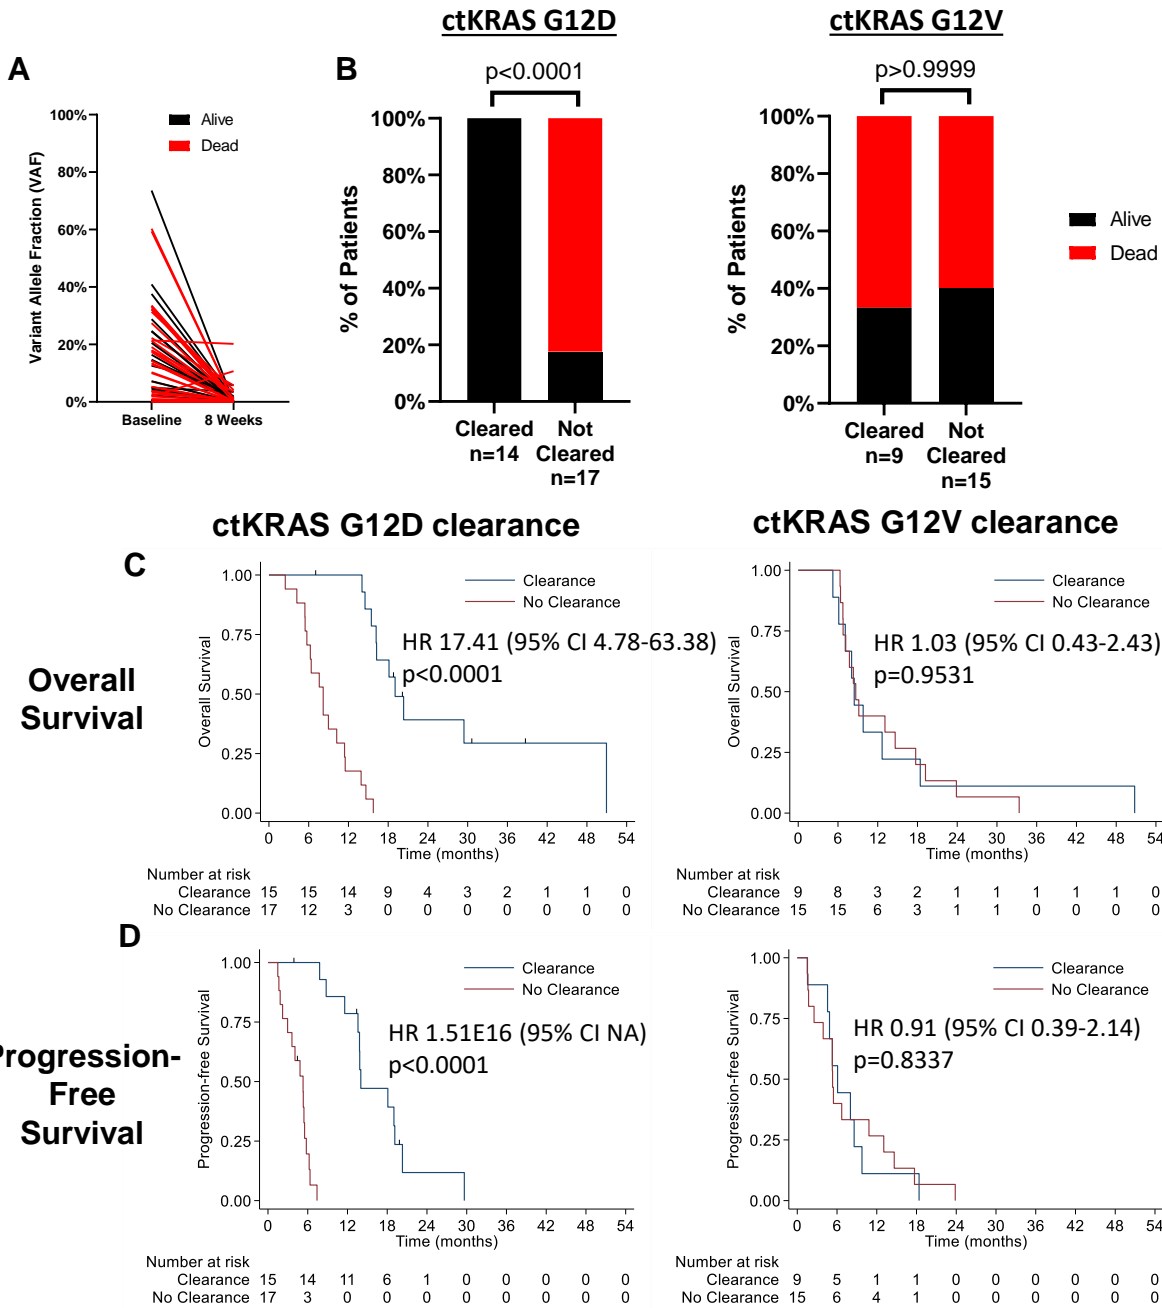

**Supplementary Figure 11. Survival association with early, on-therapy ctKRAS dynamics by variant for combined therapy-naïve PRINCE and standard of care (SOC) cohort.** Shown is the association with one-year survival (alive or dead at one year) for the combined PRINCE and SOC cohorts with any detected baseline ctKRAS mutation as measured by (A) changes in ctKRAS variant allele fraction (VAF) from baseline to week 8 on therapy (n=37), or (B) ctKRAS clearance at week 8 on therapy for G12D only (left) and G12V only (right). Shown in (C) is Kaplan-Meier analysis dichotomized by ctKRAS clearance vs no clearance and association with overall survival for G12D only (left), and G12V only (right). Results for progression-free survival shown in D. Among the 39 PRINCE patients included in the combined cohort with both a baseline and week 8 plasma obtained, 2 had insufficient follow-up to determine 1-year survival and were thus excluded from the results shown in A and B. Mann-Whitney test used for comparisons in A. Fishers exact test (two-sided) used in B. Cox regression hazard ratios (HR) and 95% confidence intervals (CI) are shown with log-rank p-values for C and D. Source data are provided as a Source Data file.

|                      | PRINCE        |               |           |               |               |           | SOC            |               |           |         |        |    |
|----------------------|---------------|---------------|-----------|---------------|---------------|-----------|----------------|---------------|-----------|---------|--------|----|
|                      | G12D          |               |           | G12V          |               |           | G12D           |               |           | G12V    |        |    |
|                      | $\rho$        | p             | n         | $\rho$        | p             | n         | $\rho$         | p             | n         | $\rho$  | p      | n  |
| SOD-All lesions      | <b>0.4160</b> | <b>0.0160</b> | <b>33</b> | 0.0633        | 0.7743        | 23        | <b>0.6182</b>  | <b>0.0003</b> | <b>30</b> | 0.3497  | 0.2662 | 12 |
| SOD-Metastases       | <b>0.3830</b> | <b>0.0278</b> | <b>33</b> | 0.3386        | 0.1140        | 23        | <b>0.6384</b>  | <b>0.0001</b> | <b>30</b> | 0.1831  | 0.5693 | 12 |
| SOD-Pancreas lesions | 0.2096        | 0.2417        | 33        | -0.1672       | 0.4458        | 23        | 0.0798         | 0.6588        | 33        | 0.1652  | 0.5124 | 18 |
| COL-All lesions      | <b>0.4878</b> | <b>0.0040</b> | <b>33</b> | 0.3459        | 0.1060        | 23        | <b>0.4927</b>  | <b>0.0057</b> | <b>30</b> | 0.3929  | 0.2062 | 12 |
| COL-Metastases       | <b>0.5011</b> | <b>0.0030</b> | <b>33</b> | 0.3459        | 0.1060        | 23        | <b>0.4927</b>  | <b>0.0057</b> | <b>30</b> | 0.4008  | 0.1964 | 12 |
| COL-Pancreas lesions | -0.0886       | 0.6241        | 33        | NA            | NA            | 23        | -0.2229        | 0.2125        | 33        | -0.2572 | 0.3028 | 18 |
| CA19-9               | 0.2246        | 0.2700        | 26        | -0.0675       | 0.7712        | 21        | <b>0.4171</b>  | <b>0.0196</b> | <b>31</b> | 0.1272  | 0.6037 | 19 |
| Albumin              | -0.2911       | 0.1003        | 33        | -0.3967       | 0.0609        | 23        | <b>-0.3831</b> | <b>0.0253</b> | <b>34</b> | -0.3826 | 0.0959 | 20 |
| ALT                  | 0.1500        | 0.4048        | 33        | <b>0.4839</b> | <b>0.0193</b> | <b>23</b> | 0.2655         | 0.1291        | 34        | 0.3237  | 0.1639 | 20 |
| AST                  | <b>0.3641</b> | <b>0.0372</b> | <b>33</b> | <b>0.6695</b> | <b>0.0005</b> | <b>23</b> | 0.3142         | 0.0703        | 34        | 0.391   | 0.0883 | 20 |
| BUN                  | 0.0099        | 0.9564        | 33        | -0.1281       | 0.5603        | 23        | 0.0748         | 0.6743        | 34        | 0.2166  | 0.359  | 20 |
| Creatinine           | -0.1637       | 0.3626        | 33        | -0.2936       | 0.1739        | 23        | 0.2225         | 0.2060        | 34        | 0.1204  | 0.6131 | 20 |
| Bilirubin            | 0.1221        | 0.4983        | 33        | 0.2762        | 0.2021        | 23        | 0.0507         | 0.7757        | 34        | 0.3851  | 0.0936 | 20 |
| Age                  | -0.1038       | 0.5655        | 33        | -0.1706       | 0.4365        | 23        | -0.0940        | 0.5970        | 34        | -0.2918 | 0.2118 | 20 |

**Supplementary Table 6.** Spearman correlation analysis (two-sided) of clinical variables and ctKRAS VAF levels for therapy-naïve PRINCE and SOC patients. SOD=Sum of diameters, COL=Count of lesions. Significant values indicated by bolded red text. NA indicates variable without variation in the cohort. Abbreviation ALT (Alanine Transaminase), AST (Aspartate Transaminase), and BUN (Blood Urea Nitrogen) are used. Source data are provided as a Source Data file.

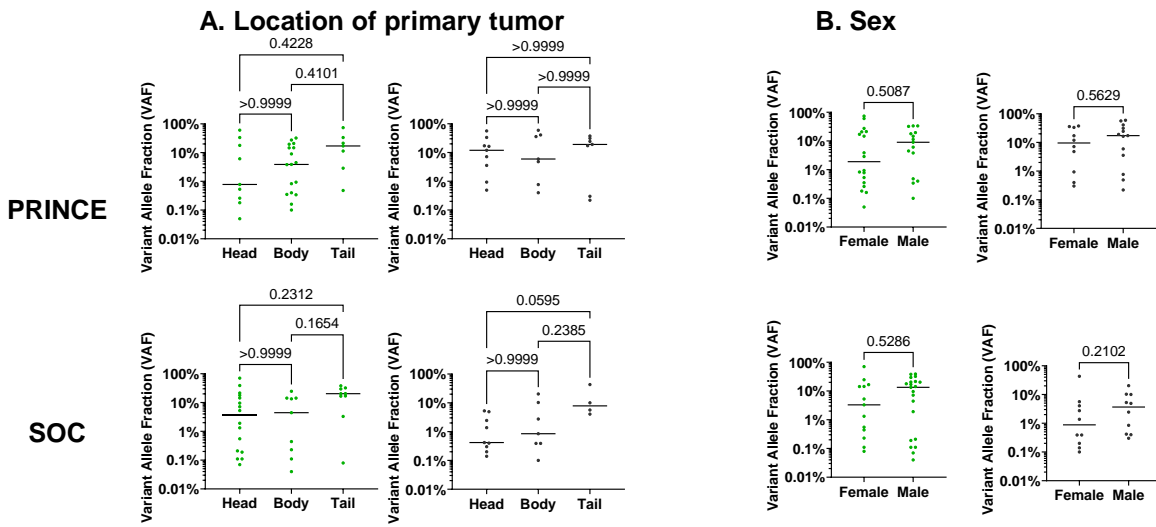

**Supplementary Figure 12. Association of primary tumor location and sex with baseline ctKRAS VAF levels for therapy-naïve PRINCE and standard of care (SOC) patients.** Plots demonstrating association between baseline ctKRAS VAF levels and (A) primary tumor location (Dunn’s multiple comparisons test) or (B) sex (Mann-Whitney test, two-sided). Asterisk indicates significance at 0.05. Green denotes ctKRAS G12D and dark grey is G12V. Source data are provided as a Source Data file.
